# Supplementary material for: Time pressure effects on decision-making in intertemporal loss scenarios: an eye-tracking study
Source: Front Psychol. 2024 Oct 11;15:1451674. doi: 10.3389/fpsyg.2024.1451674 (PMC11512456; doi:10.3389/fpsyg.2024.1451674)
Supplement: Supplementary file 1 [file Table_1.XLSX]

## Sheet: Sheet1
Name	Task	LL	SM	MFD	RT
1	1	0.02	-8.9908	201.38	839.783
3	1	0.64	5.77261	171.668	1856.1
4	1	0.95	-1.05127	190.926	1452.08
5	1	0.89	3.77383	157.469	1536.49
6	1	0	-6.82353	173.967	1079.08
7	1	0.66	-4.37087	177.558	1848.41
8	1	0.43	9.32881	253.145	2430.73
9	1	0.99	-6.59268	127.389	924.78
10	1	0.95	-0.13408	181.593	1175.13
11	1	0.98	-10.4276	148.355	1070.62
12	1	0.69	0.968959	186.479	2007.13
13	1	0.61	2.44227	181.846	1308.39
14	1	0.77	-4.77881	171.323	1162.81
16	1	0.47	-2.8011	212.52	1937.1
19	1	0.89	-0.66564	159.109	1500.56
20	1	0.9	-3.21655	156.975	1264.21
21	1	0.33	5.4328	174.899	2142.23
22	1	0.83	2.21315	199.783	2105.69
23	1	0.01	-12.9427	203.594	1014.85
24	1	0.54	10.4007	176.289	2143.25
25	1	0.07	-9.14481	170.854	845.819
26	1	0.04	0.887745	187.249	1541.02
27	1	0.53	-2.54951	149.513	490.27
28	1	0.27	-4.17944	155.201	867.379
29	1	0.01	-10.4757	183.059	875.678
30	1	0.97	-0.80391	177.235	1345.37
31	1	0.09	-5.45628	208.227	1102.92
32	1	0.21	-0.665141	189.065	1449.99
33	1	0.93	-4.14254	148.305	1474.75
34	1	0.89	-6.44087	155.386	676.893
35	1	0.2	-7.41651	187.045	1157.76
37	1	0.03	-9.24673	196.075	775.385
38	1	0.14	-3.64138	223.324	1632.62
40	1	0.99	-4.82506	143.842	904.614
41	1	0.45	-9.70885	192.14	951.285
43	1	0	-5.04986	187.356	1182.38
44	1	0.98	-5.91517	131.648	946.172
45	1	0.79	-4.81213	150.79	1669.98
46	1	0	-8.79773	206.598	1266.08
47	1	0.82	6.80832	193.746	1790.59
48	1	0.82	-7.16743	172.088	1881.99
49	1	0.63	-1.19312	182.489	1774.45
50	1	0.95	-4.96302	175.091	1229.77
51	1	0	-7.47359	189.046	930.47
52	1	0.61	3.59416	219.389	2105.91
53	1	0.89	8.37391	165.438	1879.06
54	1	0.4	2.70701	194.759	2005.38
55	1	0.07	-9.5796	143.529	770.268
56	1	1	-4.45056	166.083	1242.86
57	1	0.68	0.636995	182.886	2166.89
58	1	0.66	-2.13049	189.998	2079.59
66	1	0.2	-5.81245	206.698	1604.03
67	1	0.01	-4.27099	168.536	1293.29
68	1	0.56	7.90912	162.27	1627.86
69	1	0.03	-5.32994	156.559	1089.82
70	1	0.71	1.5991	179.622	2090.62
71	1	0.78	3.13171	187.86	2113.64
72	1	0.18	3.37848	176.198	1669.27
73	1	0.89	-3.96753	183.959	1961.96
74	1	0.31	6.55744	187.177	1910.33
75	1	0.05	-3.82737	170.082	1749.27
76	1	0.01	-2.88675	171.005	1783.73
77	1	0.95	4.39568	173.146	1597.98
78	1	0.42	5.96288	229.734	2320.12
79	1	0.57	4.6363	226.141	2215.7
80	1	0.46	4.54003	197.512	1988.35
81	1	0.64	-1.56145	194.771	1679.92
82	1	0.77	-2.2454	168.085	852.731
83	1	0.07	-6.1348	170.759	780.54
1	0	0.02	-4.83333	216.409	936.626
3	0	0.82	5.98926	187.968	5066.66
4	0	0.91	11.9728	213.966	6098.32
5	0	0.72	4.62668	187.242	2783.4
6	0	0.01	-3.70695	174.845	1727.83
7	0	0.5	-3.43864	191.123	6159.62
8	0	0.39	6.59647	300.018	4837.82
9	0	0.97	-3.65943	138.883	1421.59
10	0	0.82	4.64565	249.844	2957.27
11	0	0.76	-8.24381	255.986	4056.25
12	0	0.61	-5.09914	254.908	5212.92
13	0	0.72	8.01998	193.466	2111.11
14	0	0.71	0.824589	209.603	2347.24
16	0	0.8	-2.75348	219.228	2144.19
19	0	0.54	15.4702	180.229	4469.87
20	0	0.96	-4.16248	193.34	2501.63
21	0	0.33	12.7103	194.254	7243.52
22	0	0.84	10.204	228.618	6241.04
23	0	0.03	-9.84873	247.949	1352.34
24	0	0.63	11.6076	210.729	4762.17
25	0	0.09	-6.42372	186.676	869.012
26	0	0.01	-1.71439	162.64	1121.82
27	0	0.93	-6.69052	152.384	795.515
28	0	0.55	3.80635	168.005	2686.71
29	0	0.03	-8.18665	203.172	1002.43
30	0	0.73	4.2527	207.068	2725
31	0	0.86	3.45692	199.516	1598.02
32	0	0.25	0.149441	183.961	2200.18
33	0	0.86	-1.78744	192.297	3757.09
34	0	0.86	-0.265935	191.989	2070.19
35	0	0.36	-3.41587	235.554	3466.09
37	0	0.01	-8.39329	181.805	837.376
38	0	0.69	7.75	265.665	5224.87
40	0	0.97	-3.39503	175.898	1592.43
41	0	0.4	-5.70419	268.267	1755.32
43	0	0	-9.56924	195.72	1328.93
44	0	0.97	-4.25852	157.641	1494.2
45	0	0.97	-6.71588	152.286	1484.6
46	0	0.01	-9.37283	179.886	986.419
47	0	0.97	8.00238	212.606	2458.04
48	0	0.79	-6.13941	185.823	2616.27
49	0	0.75	-3.92428	196.371	2104.14
50	0	0.99	-6.28587	173.846	1047.49
51	0	0	10.8333	207.157	901.188
52	0	0.79	6.50741	224.79	2875.43
53	0	0.71	8.43187	221.72	6835.68
54	0	0.69	5.23723	203.926	2897.46
55	0	0.08	-10.283	140.435	788.21
56	0	0.82	2.59941	218.909	6144.01
57	0	0.77	-3.58979	220.661	4473.69
58	0	0.71	-10.3284	188.997	2781.71
66	0	0.52	5.72576	220.331	3171.81
67	0	0	-5.24498	163.268	1355.05
68	0	0.8	8.59542	203.336	3318.1
69	0	0.01	-5.18267	146.94	866.948
70	0	0.87	12.9165	215.553	4211.86
71	0	0.86	6.11975	205.203	2809.14
72	0	0.22	3.91601	185.306	2905.33
73	0	0.89	-4.55037	174.437	1806.49
74	0	0.24	6.96366	208.143	3173.55
75	0	0.28	-2.51365	207.64	2195.56
76	0	0	-4.40256	172.365	1660.23
77	0	0.97	6.6105	181.471	2415.41
78	0	0.56	5.24201	271.278	7076.26
79	0	0.28	5.28091	266.878	8167.29
80	0	0.85	10.0845	188.106	3376.11
81	0	0.65	1.51431	205.19	3450.39
82	0	0.58	-0.512989	169.345	705.801
83	0	0.06	0.167395	190.486	2935.22
