# Supplementary material for: Time pressure effects on decision-making in intertemporal loss scenarios: an eye-tracking study
Source: Front Psychol. 2024 Oct 11;15:1451674. doi: 10.3389/fpsyg.2024.1451674 (PMC11512456; doi:10.3389/fpsyg.2024.1451674)
Supplement: Supplementary file 2 [file Table_2.XLSX]

## Sheet: Time pressure 
number	A delay	A outcome	B delay	B outcome
1	41 days	480 yuan	81 days	680 yuan
2	25 days	310 yuan	91 days	750 yuan
3	18 days	630 yuan	69 days	970 yuan
4	20 days	210 yuan	39 days	280 yuan
5	14 days	320 yuan	64 days	980 yuan
6	89 days	510 yuan	93 days	550 yuan
7	61 days	790 yuan	82 days	890 yuan
8	23 days	330 yuan	64 days	860 yuan
9	12 days	280 yuan	44 days	450 yuan
10	19 days	430 yuan	39 days	650 yuan
11	23 days	590 yuan	96 days	970 yuan
12	17 days	380 yuan	68 days	460 yuan
13	22 days	320 yuan	94 days	840 yuan
14	64 days	520 yuan	82 days	760 yuan
15	34 days	660 yuan	86 days	970 yuan
16	18 days	670 yuan	69 days	990 yuan
17	19 days	450 yuan	88 days	690 yuan
18	84 days	330 yuan	90 days	350 yuan
19	16 days	610 yuan	65 days	970 yuan
20	62 days	760 yuan	79 days	850 yuan
21	54 days	710 yuan	93 days	820 yuan
22	22 days	410 yuan	35 days	490 yuan
23	53 days	570 yuan	89 days	670 yuan
24	18 days	490 yuan	49 days	950 yuan
25	46 days	380 yuan	97 days	770 yuan
26	16 days	170 yuan	49 days	260 yuan
27	44 days	580 yuan	64 days	710 yuan
28	30 days	520 yuan	59 days	950 yuan
29	70 days	590 yuan	87 days	790 yuan
30	17 days	190 yuan	49 days	330 yuan
31	21 days	280 yuan	45 days	670 yuan
32	13 days	880 yuan	44 days	990 yuan
33	28 days	210 yuan	82 days	740 yuan
34	27 days	580 yuan	58 days	950 yuan
35	72 days	480 yuan	85 days	560 yuan
36	15 days	620 yuan	60 days	930 yuan
37	42days	210 yuan	52 days	280 yuan
38	24 days	340 yuan	36 days	530 yuan
39	33 days	410 yuan	44 days	680 yuan
40	62 days	700 yuan	79 days	840 yuan
41	24 days	370 yuan	35 days	440 yuan
42	53 days	430 yuan	99 days	720 yuan
43	49 days	390 yuan	96 days	720 yuan
44	43days	480 yuan	64 days	660 yuan
45	21 days	300 yuan	72 days	620 yuan
46	31 days	420 yuan	59 days	620 yuan
47	26 days	480 yuan	58 days	700 yuan
48	45 days	250 yuan	83 days	420 yuan
49	69 days	410 yuan	85 days	510 yuan
50	45 days	210 yuan	55 days	280 yuan
51	13 days	200 yuan	32 days	190 yuan
52	49 days	780 yuan	88 days	690 yuan
53	55 days	120 yuan	99 days	119 yuan
54	67 days	450 yuan	88 days	430 yuan
55	39 days	330 yuan	48 days	320 yuan
